# Supplementary material for: Synthesis of ultrathin metal oxide and hydroxide nanosheets using formamide in water at room temperature
Source: Royal Society of Chemistry journal article supplement (doi:10.1039/d1ce00277e), 2021-01-01
Supplement: d1ce00277e1.pdf [file d1ce00277e1.pdf]

## Electronic Supplementary Information(ESI†)

### Synthesis of ultrathin metal oxide and hydroxide nanosheets using formamide in water at room temperature

Zongkun Chen<sup>a</sup>, Minghua Huang<sup>b\*</sup>, Helmut Cölfen<sup>a\*</sup>

<sup>a</sup>University of Konstanz, Physical Chemistry, Universitätsstraße 10, D-78457 Konstanz, Germany

<sup>b</sup>School of Materials Science and Engineering, Ocean University of China, Qingdao 266100, China

#### Synthesis recipes.

| Nanomaterials                                             | Precursor                                              | Solvent                                      | Reaction Concentration | Gas Diffusion Strategy                 | Reaction Temperature |
|-----------------------------------------------------------|--------------------------------------------------------|----------------------------------------------|------------------------|----------------------------------------|----------------------|
| Co <sub>3</sub> O <sub>4</sub> /Co(OH) <sub>2</sub>       | CoCl <sub>2</sub>                                      | water (20 mL) and formamide (20 mL)          | 20 mM                  | 2 mL NH <sub>3</sub> ·H <sub>2</sub> O | 25 °C                |
| Co <sub>3</sub> O <sub>4</sub> /Co(OH) <sub>2</sub>       | CoCl <sub>2</sub>                                      | water (40 mL)                                | 20 mM                  | 2 mL NH <sub>3</sub> ·H <sub>2</sub> O | 25 °C                |
| γ-Fe <sub>2</sub> O <sub>3</sub>                          | FeCl <sub>2</sub> ·4H <sub>2</sub> O                   | water (20 mL) and formamide (20 mL)          | 20 mM                  | 2 mL NH <sub>3</sub> ·H <sub>2</sub> O | 25 °C                |
| γ-Fe <sub>2</sub> O <sub>3</sub>                          | FeCl <sub>2</sub> ·4H <sub>2</sub> O                   | water (40 mL)                                | 20 mM                  | 2 mL NH <sub>3</sub> ·H <sub>2</sub> O | 25 °C                |
| Mn <sub>3</sub> O <sub>4</sub>                            | MnCl <sub>2</sub> ·4H <sub>2</sub> O                   | water (20 mL) and formamide (20 mL)          | 200 mM                 | 2 mL NH <sub>3</sub> ·H <sub>2</sub> O | 25 °C                |
| Mn <sub>3</sub> O <sub>4</sub>                            | MnCl <sub>2</sub> ·4H <sub>2</sub> O                   | water (40 mL)                                | 200 mM                 | 2 mL NH <sub>3</sub> ·H <sub>2</sub> O | 25 °C                |
| ZnO                                                       | ZnCl <sub>2</sub>                                      | water (20 mL) and formamide (20 mL)          | 40 mM                  | 2 mL NH <sub>3</sub> ·H <sub>2</sub> O | 25 °C                |
| ZnO                                                       | ZnCl <sub>2</sub>                                      | water (40 mL)                                | 40 mM                  | 2 mL NH <sub>3</sub> ·H <sub>2</sub> O | 25 °C                |
| Cu(OH) <sub>2</sub> ·H <sub>2</sub> O                     | Cu(CH <sub>3</sub> COO) <sub>2</sub> ·H <sub>2</sub> O | water (20 mL) and formamide (20 mL)          | 200 mM                 | 2 mL NH <sub>3</sub> ·H <sub>2</sub> O | 25 °C                |
| Cu(OH) <sub>2</sub> ·H <sub>2</sub> O                     | Cu(CH <sub>3</sub> COO) <sub>2</sub> ·H <sub>2</sub> O | water (40 mL)                                | 200 mM                 | 2 mL NH <sub>3</sub> ·H <sub>2</sub> O | 25 °C                |
| Mg(OH) <sub>2</sub> /Mg <sub>2</sub> (OH) <sub>3</sub> Cl | MgCl <sub>2</sub> ·6H <sub>2</sub> O                   | water (30 mL) and formamide (10 mL)          | 200 mM                 | 2 mL NH <sub>3</sub> ·H <sub>2</sub> O | 25 °C                |
| Mg(OH) <sub>2</sub> /Mg <sub>2</sub> (OH) <sub>3</sub> Cl | MgCl <sub>2</sub> ·6H <sub>2</sub> O                   | water (40 mL)                                | 200 mM                 | 2 mL NH <sub>3</sub> ·H <sub>2</sub> O | 25 °C                |
| Mg(OH) <sub>2</sub> /Mg <sub>2</sub> (OH) <sub>3</sub> Cl | MgCl <sub>2</sub> ·6H <sub>2</sub> O                   | water (30 mL) and ethanolamine (10 mL)       | 200 mM                 | 2 mL NH <sub>3</sub> ·H <sub>2</sub> O | 25 °C                |
| Mg(OH) <sub>2</sub> /Mg <sub>2</sub> (OH) <sub>3</sub> Cl | MgCl <sub>2</sub> ·6H <sub>2</sub> O                   | water (30 mL) and ethylenediamine (10 mL)    | 200 mM                 | 2 mL NH <sub>3</sub> ·H <sub>2</sub> O | 25 °C                |
| Mg(OH) <sub>2</sub> /Mg <sub>2</sub> (OH) <sub>3</sub> Cl | MgCl <sub>2</sub> ·6H <sub>2</sub> O                   | water (30 mL) and dimethyl formamide (10 mL) | 200 mM                 | 2 mL NH <sub>3</sub> ·H <sub>2</sub> O | 25 °C                |

|                                                           |                                      |                                      |        |                                        |       |
|-----------------------------------------------------------|--------------------------------------|--------------------------------------|--------|----------------------------------------|-------|
| Mg(OH) <sub>2</sub> /Mg <sub>2</sub> (OH) <sub>3</sub> Cl | MgCl <sub>2</sub> ·6H <sub>2</sub> O | water (30 mL) and ethanol (10 mL)    | 200 mM | 2 mL NH <sub>3</sub> ·H <sub>2</sub> O | 25 °C |
| Mg(OH) <sub>2</sub> /Mg <sub>2</sub> (OH) <sub>3</sub> Cl | MgCl <sub>2</sub> ·6H <sub>2</sub> O | water (30 mL) and hydrazine (10 mL)  | 200 mM | 2 mL NH <sub>3</sub> ·H <sub>2</sub> O | 25 °C |
| Mg(OH) <sub>2</sub> /Mg <sub>2</sub> (OH) <sub>3</sub> Cl | MgCl <sub>2</sub> ·6H <sub>2</sub> O | 40 mL water containing 0.1 g glycine | 200 mM | 2 mL NH <sub>3</sub> ·H <sub>2</sub> O | 25 °C |

### Sample preparation for the measurement of solution phase <sup>13</sup>C NMR spectrum.

(a) for the sample of pure water after introducing NH<sub>3</sub>: A vial containing 38 mL H<sub>2</sub>O and 2 mL D<sub>2</sub>O (internal reference) was sealed with parafilm and three pinholes were drilled allowing for gas diffusion. Subsequently, the vial was put into a sealed blue cap bottle (100 mL) with 2 mL concentrated ammonium hydroxide solution. After the diffusion for 12 hours at room temperature, 1 mL reaction solution was taken out as one sample and <sup>13</sup>C nuclear magnetic resonance spectrum of such sample was recorded immediately.

(b) for the sample of aqueous solution containing MgCl<sub>2</sub> after introducing NH<sub>3</sub>: A solution containing precursor was prepared by dissolving MgCl<sub>2</sub>·6H<sub>2</sub>O (200 mM) in the mixed solvent of 38 mL H<sub>2</sub>O and 2 mL D<sub>2</sub>O (internal reference). After ultrasonic dissolution, the vial was then sealed with parafilm and three pinholes were drilled allowing for gas diffusion. Subsequently, the vial was put into a sealed blue cap bottle (100 mL) with 2 mL concentrated ammonium hydroxide solution. After the diffusion for 12 hours at room temperature, 1 mL reaction solution was taken out as one sample and <sup>13</sup>C nuclear magnetic resonance spectrum of such sample was recorded immediately.

(c) for the sample of pure formamide aqueous solution: A mixed solvent of 28 mL H<sub>2</sub>O, 2 mL D<sub>2</sub>O (internal reference) and 10 mL formamide was prepared. Then, 1 mL reaction solution was taken out as one sample and <sup>13</sup>C nuclear magnetic resonance spectrum of such sample was recorded immediately.

(d) for the sample of formamide aqueous solution containing MgCl<sub>2</sub>: A solution containing precursor was prepared by dissolving MgCl<sub>2</sub>·6H<sub>2</sub>O (200 mM) in the mixed solvent of 28 mL H<sub>2</sub>O, 2 mL D<sub>2</sub>O (internal reference) and 10 mL formamide. After ultrasonic dissolution, 1 mL reaction solution was taken out as one sample and <sup>13</sup>C nuclear magnetic resonance spectrum of such sample was recorded immediately.

(e) for the sample of formamide aqueous solution after introducing NH<sub>3</sub> without MgCl<sub>2</sub>: A vial containing 28 mL H<sub>2</sub>O, 2 mL D<sub>2</sub>O (internal reference) and 10 mL formamide was sealed with parafilm and three pinholes were drilled allowing for gas diffusion. Subsequently, the vial was put into a sealed blue cap bottle (100 mL) with 2 mL concentrated ammonium hydroxide solution. After the diffusion for 12 hours at room temperature, 1 mL reaction solution was taken out as one sample and <sup>13</sup>C nuclear magnetic resonance spectrum of such sample was recorded immediately.

(f) for the sample of formamide aqueous solution containing MgCl<sub>2</sub> after introducing NH<sub>3</sub>: A

solution containing precursor was prepared by dissolving  $\text{MgCl}_2 \cdot 6\text{H}_2\text{O}$  (200 mM) in the mixed solvent of 28 mL  $\text{H}_2\text{O}$ , 2 mL  $\text{D}_2\text{O}$  (internal reference) and 10 mL formamide. After ultrasonic dissolution, the vial was put into a sealed blue cap bottle (100 mL) with 2 mL concentrated ammonium hydroxide solution. After the diffusion for 12 hours at room temperature, 1 mL reaction solution was taken out as one sample and  $^{13}\text{C}$  nuclear magnetic resonance spectrum of such sample was recorded immediately.

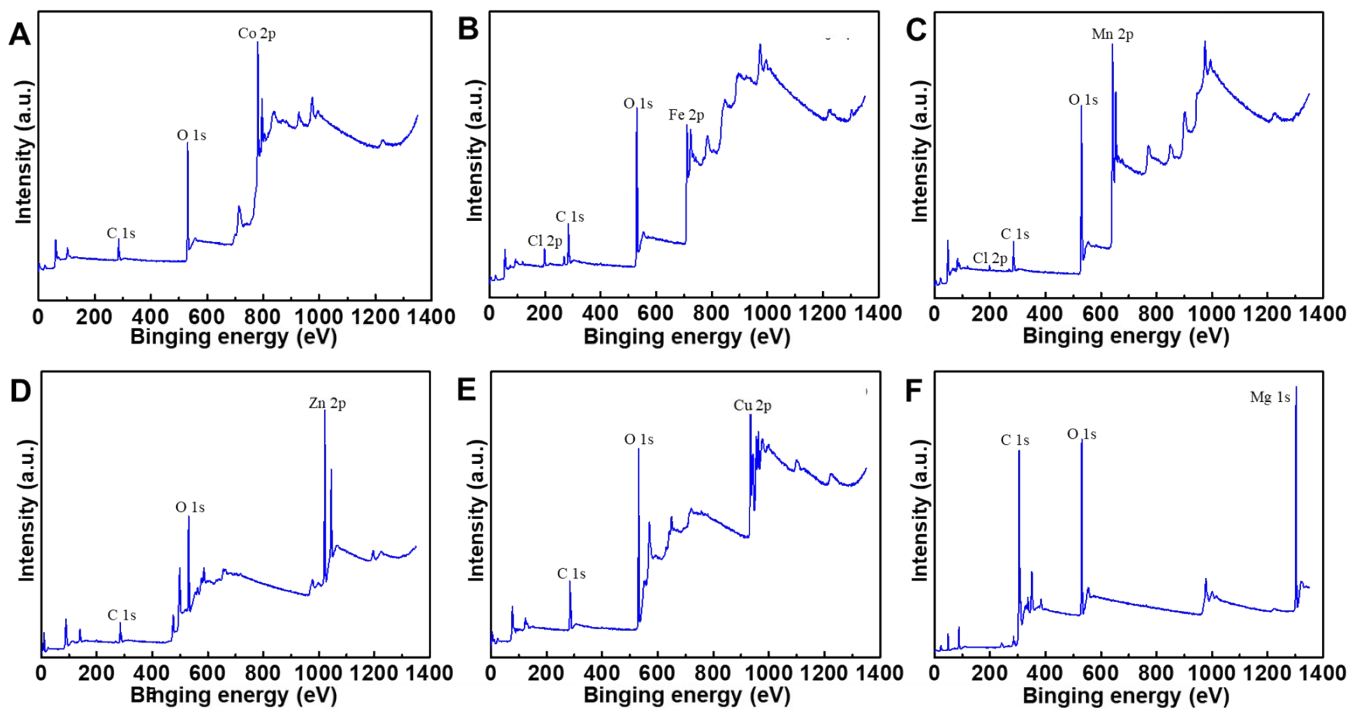

**Fig. S1.** XPS survey spectra of (A)  $\text{Co}_3\text{O}_4/\text{Co}(\text{OH})_2$ , (B)  $\gamma\text{-Fe}_2\text{O}_3$ , (C)  $\text{Mn}_3\text{O}_4$ , (D)  $\text{ZnO}$ , (E)  $\text{Cu}(\text{OH})_2 \cdot \text{H}_2\text{O}$  and (F)  $\text{Mg}(\text{OH})_2/\text{Mg}_2(\text{OH})_3\text{Cl}$ .

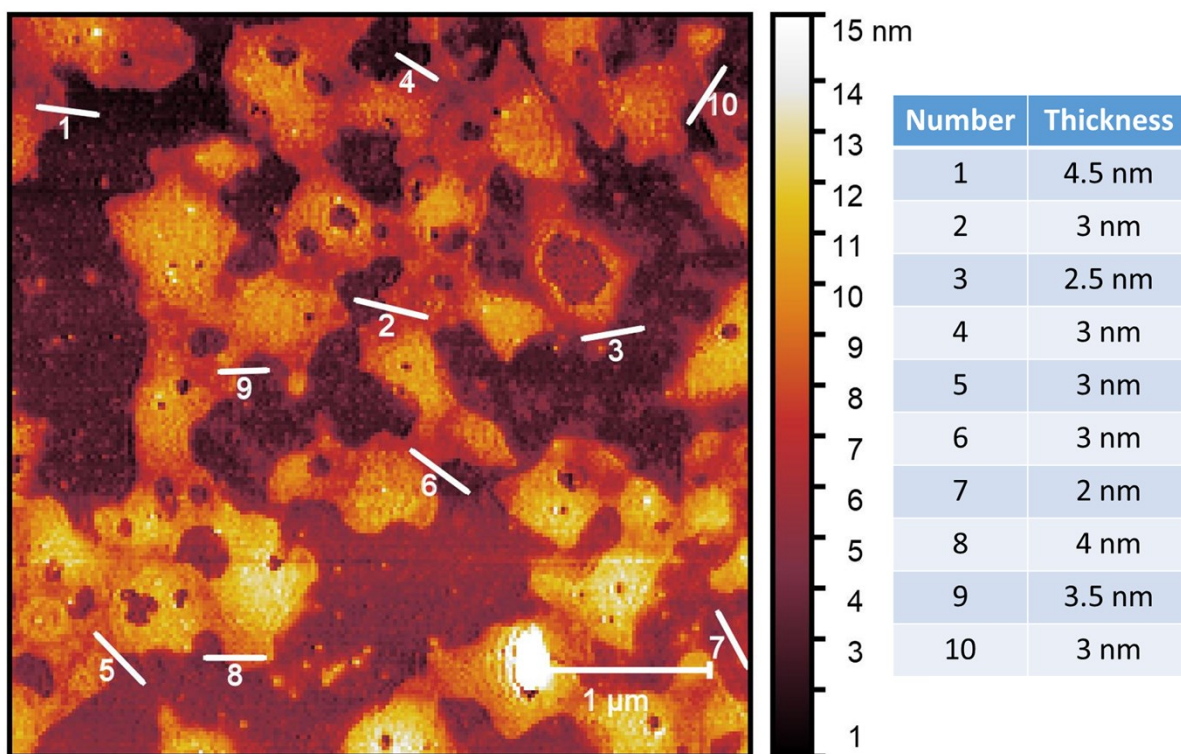

**Fig. S2-1.** AFM image of 2D  $\text{Co}_3\text{O}_4/\text{Co}(\text{OH})_2$  nanomaterials and the inset shows the corresponding thickness.

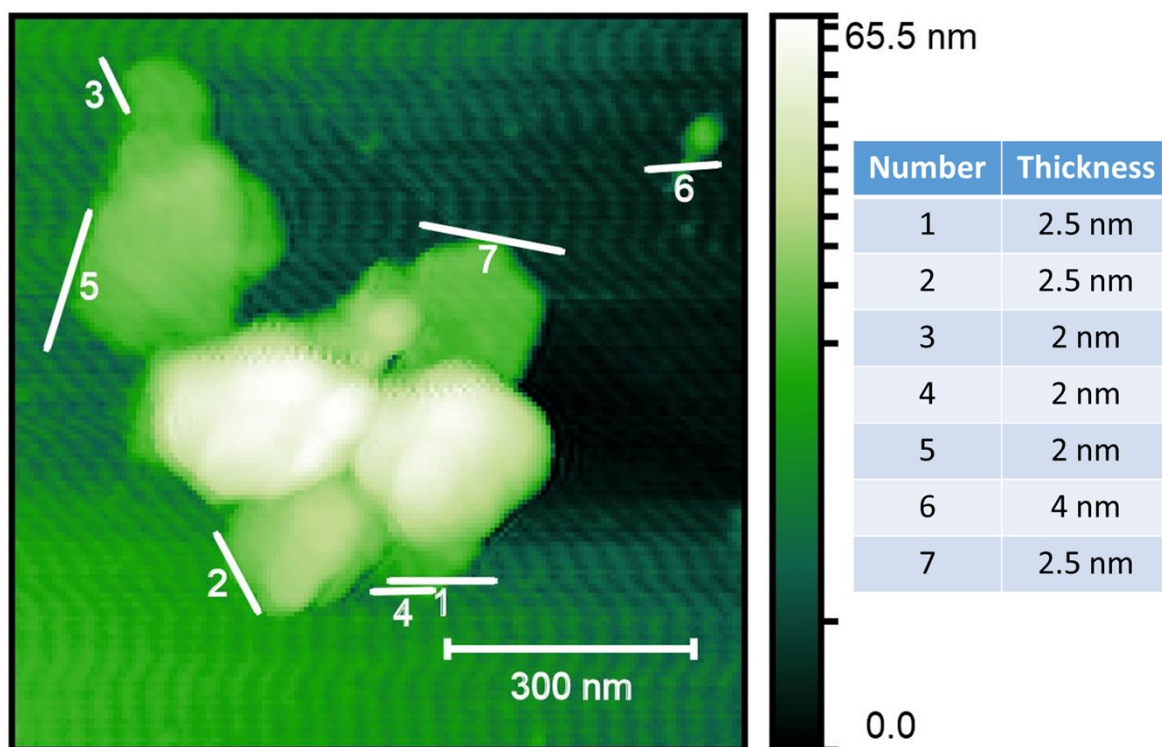



**Fig. S2-2.** AFM image of 2D  $\gamma\text{-Fe}_2\text{O}_3$  nanomaterials and the inset shows the corresponding

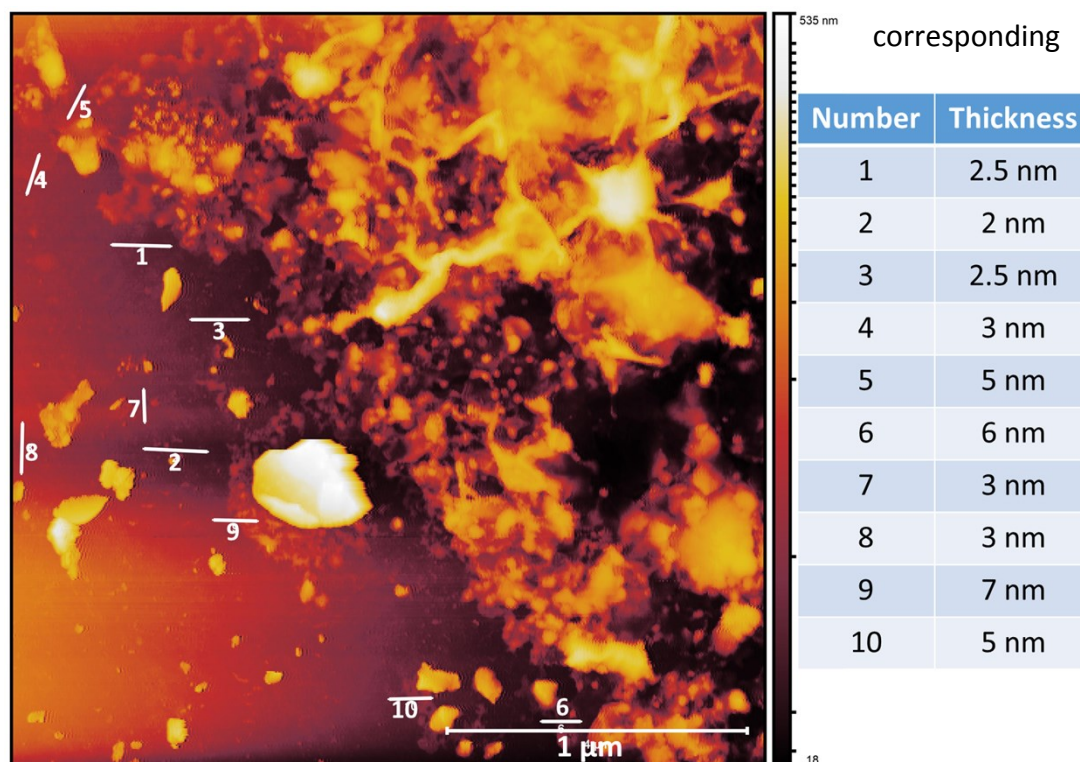

thickness.

**Fig. S2-3.** AFM image of 2D  $\text{Mn}_3\text{O}_4$  nanomaterials and the inset shows the corresponding thickness.

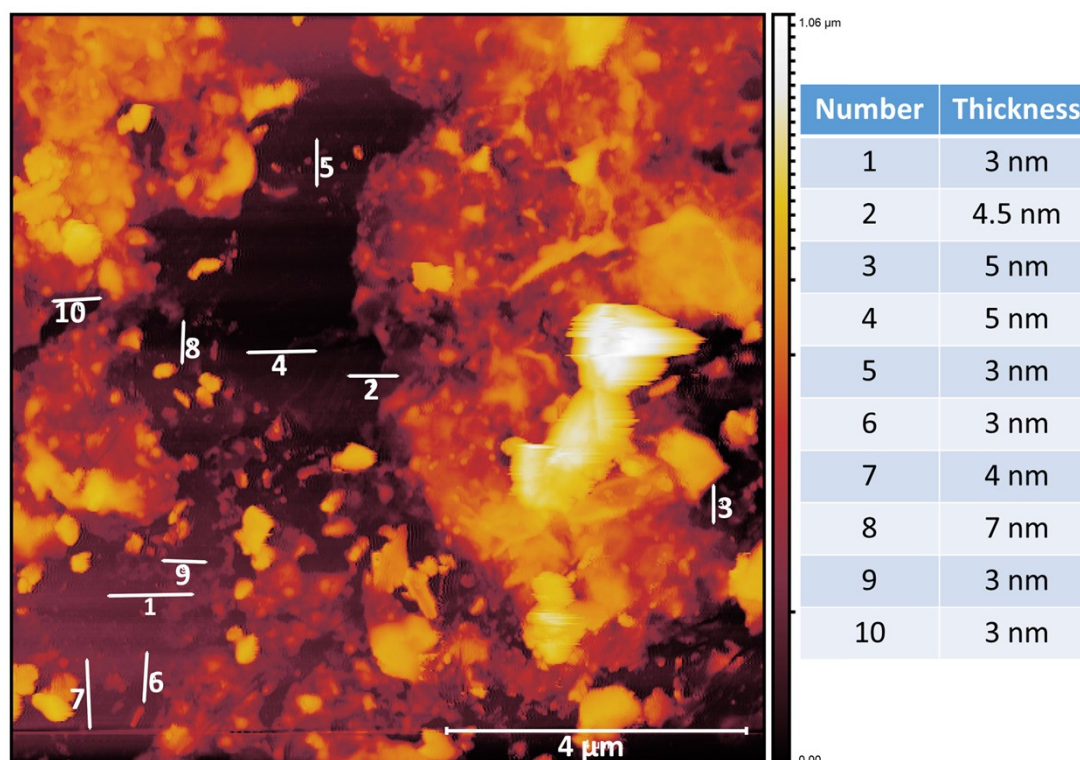

**Fig. S2-4.** AFM image of 2D ZnO nanomaterials and the inset shows the corresponding thickness.

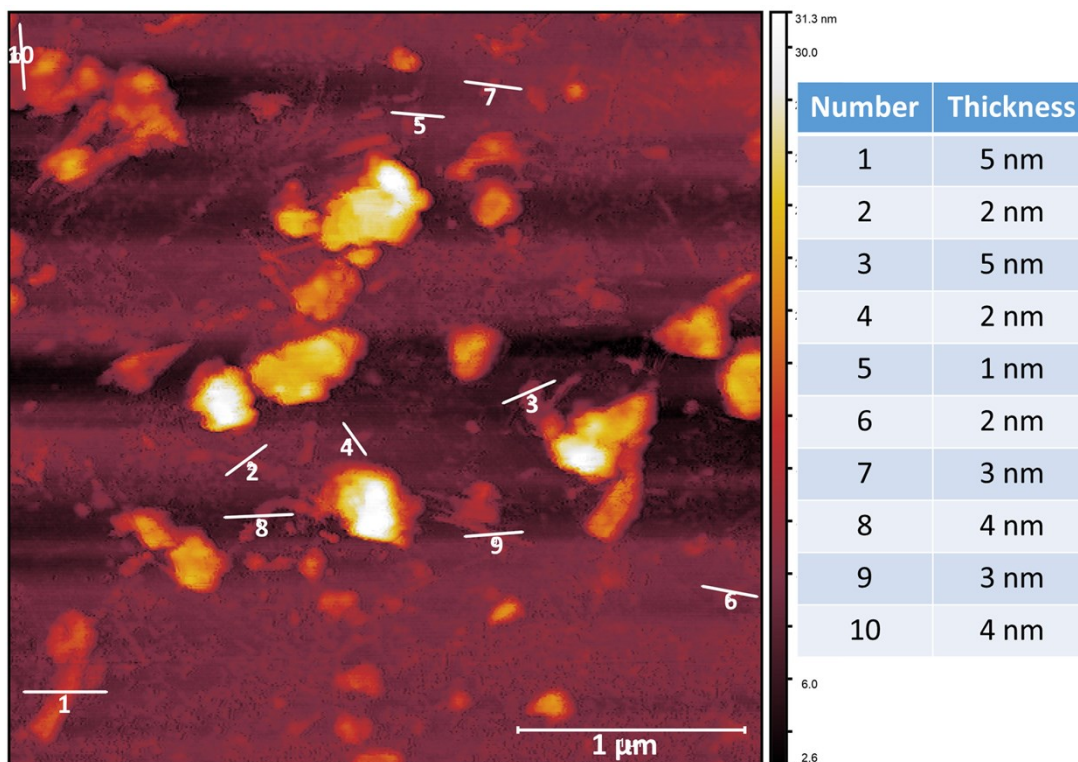

**Fig. S2-5.** AFM image of 2D Cu(OH)<sub>2</sub>·H<sub>2</sub>O nanomaterials and the inset shows the corresponding thickness.

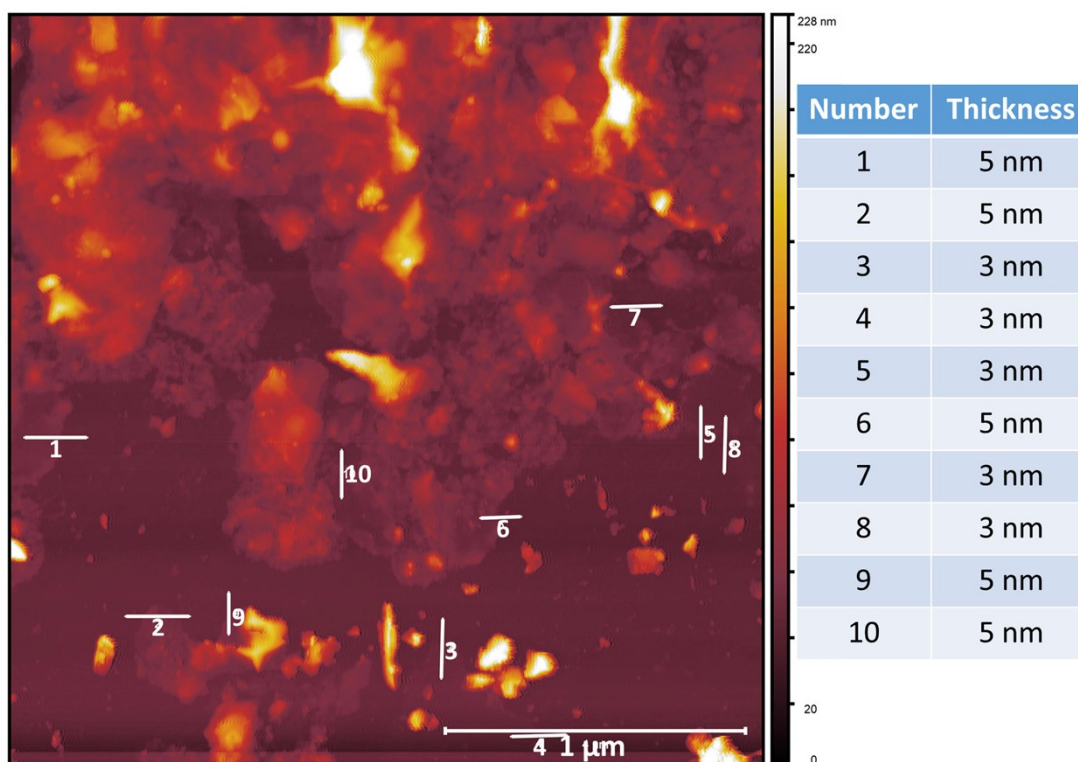

**Fig. S2-6.** AFM image of 2D  $\text{Mg}(\text{OH})_2/\text{Mg}_2(\text{OH})_3\text{Cl}$  nanomaterials and the inset shows the corresponding thickness.

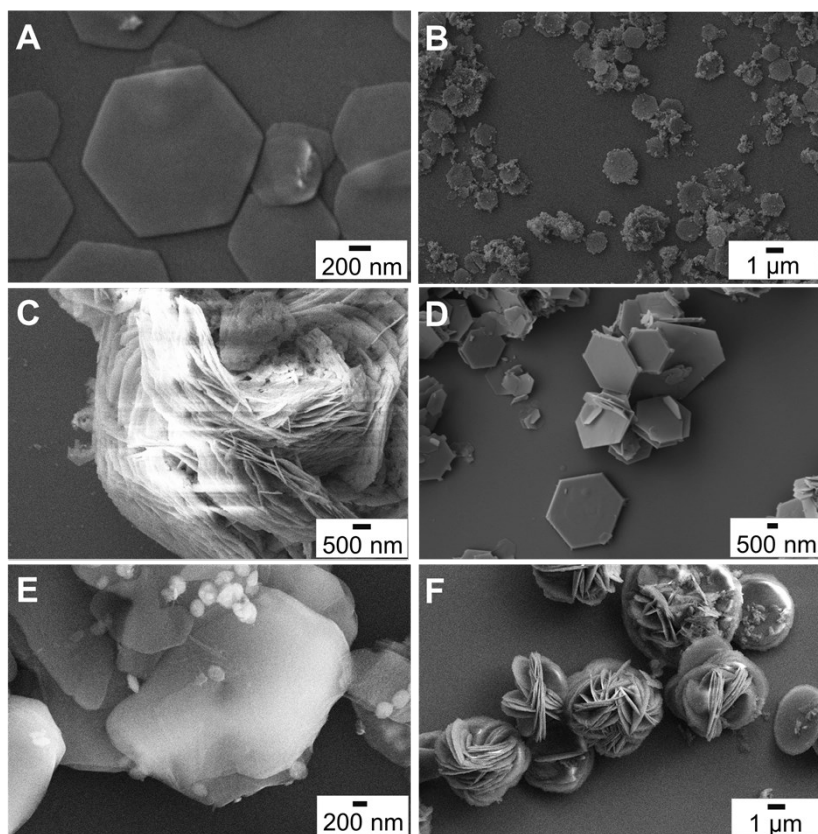

**Fig. S3.** SEM images of nanomaterials synthesized in water. (A) cobalt hydroxide, (B) ferric oxide, (C) manganese oxide, (D) zinc hydroxide, (E) copper hydroxide and (F)  $\text{Mg}(\text{OH})_2$  nanomaterials.



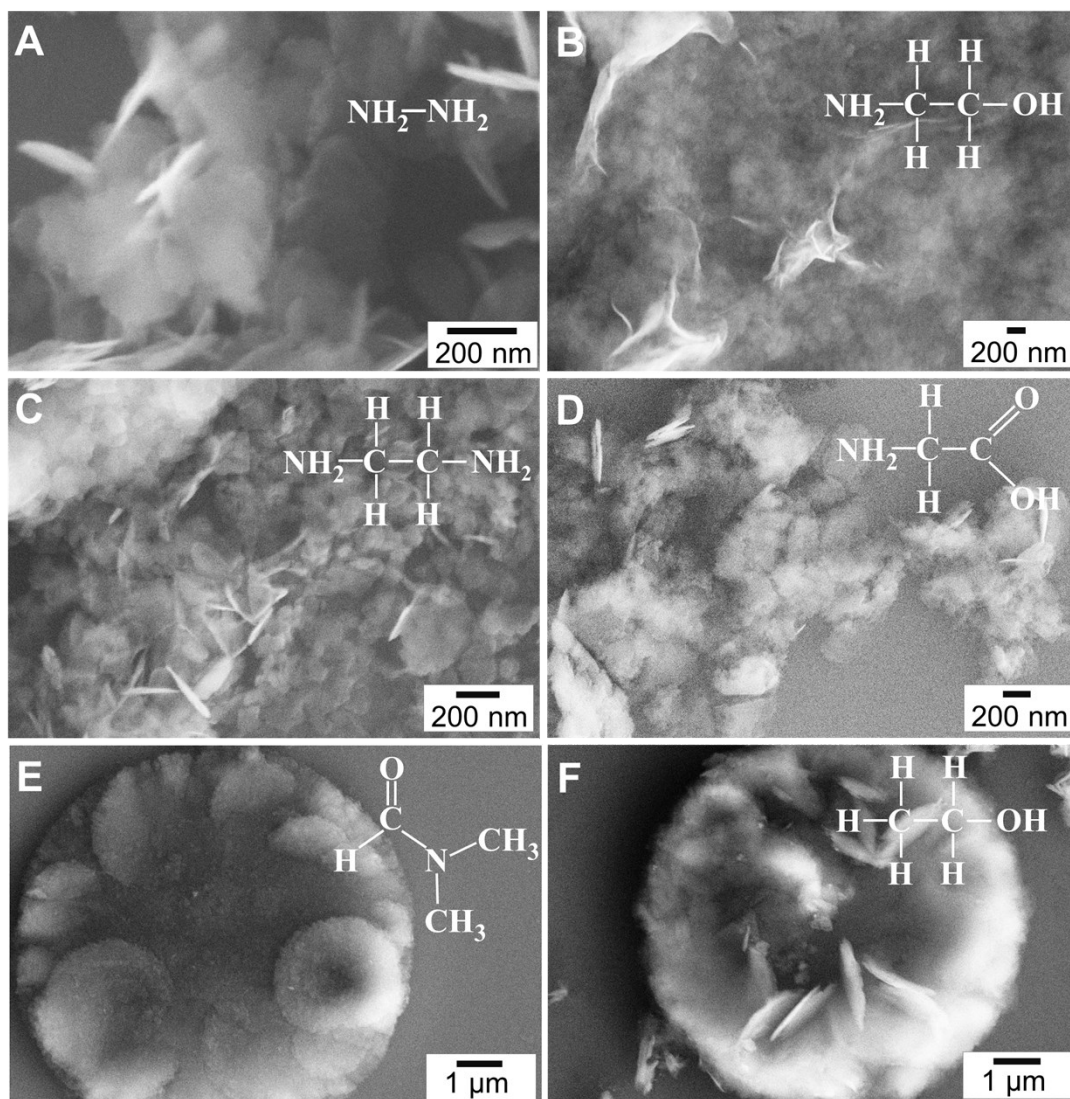

**Fig. S4.** The molecular formula of organic solvent and SEM image of 2D Mg(OH)<sub>2</sub> nanomaterials obtained in different mixed solvents. (A) water and hydrazine, (B) water and ethanolamine, (C) water and ethylenediamine, (D) aqueous solution of glycine, (E) water and dimethyl formamide and (F) water and ethanol.

**Table. S1.** The relative polarity of different solvents.

| Solvent            | Relative polarity | Reference                                                                 |
|--------------------|-------------------|---------------------------------------------------------------------------|
| Water              | 9                 | <a href="https://www.chemicalbook.com/">https://www.chemicalbook.com/</a> |
| Formamide          | 7.3               | <a href="https://www.chemicalbook.com/">https://www.chemicalbook.com/</a> |
| Ethanolamine       | 0.651             | <a href="https://www.chemicalbook.com/">https://www.chemicalbook.com/</a> |
| Ethylenediamine    | /                 | /                                                                         |
| Glycine            | /                 | /                                                                         |
| Hydrazine          | /                 | /                                                                         |
| Dimethyl Formamide | 0.386             | <a href="https://www.chemicalbook.com/">https://www.chemicalbook.com/</a> |
| Ethanol            | 0.654             | <a href="https://www.chemicalbook.com/">https://www.chemicalbook.com/</a> |

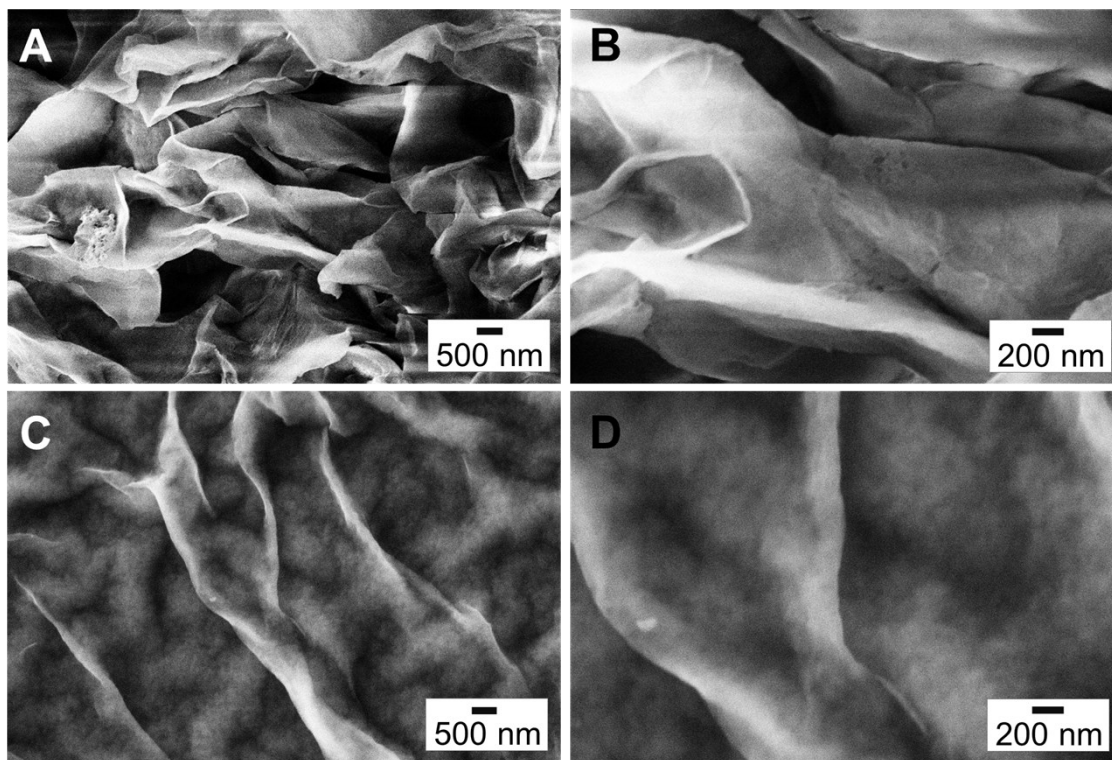

**Fig. S5.** SEM images of ultrathin  $\text{Mg}(\text{OH})_2/\text{Mg}_2(\text{OH})_3\text{Cl}$  nanosheets obtained by introducing  $\text{NH}_3$  into formamide aqueous solution containing  $\text{MgCl}_2$  via different ways. (A-B)  $\text{NH}_3$ -diffusion method using 2 mL concentrated  $\text{NH}_3\cdot\text{H}_2\text{O}$  (14.8 mol/L) as the alkaline source. (C-D) One-off addition of 2 mL concentrated  $\text{NH}_3\cdot\text{H}_2\text{O}$  (14.8 mol/L).
